# Supplementary material for: Essential Role of CgErg6p in Maintaining Oxidative Stress Tolerance and Iron Homeostasis in Candida glabrata
Source: MDPI journal article supplement (doi:10.3390/jof9050579), 2023-05-17
Supplement: s1 [file s1]

## Supplementary material

**Table S1. List of oligonucleotides**

|                 |                        |
|-----------------|------------------------|
| <i>CgACT1 F</i> | TTCAACGTTCCAGCCTTCT    |
| <i>CgACT1 R</i> | GTAACACCGTCACCAGAGT    |
| <i>CgYAP1 F</i> | GTGGACTTGGAGAACTTGAC   |
| <i>CgYAP1 R</i> | ACTTCCGCAACTCTTTCAC    |
| <i>CgMSN4 F</i> | CATTAATCCCGTATTGCTGTCC |
| <i>CgMSN4 R</i> | CTTCGTTGTCGTAATCATTGCC |
| <i>CgCTA1 F</i> | ACAAACTAAGTTGAAGGACCCA |
| <i>CgCTA1 R</i> | GACATAGTGCCATTACCCCT   |
| <i>CgSOD1 F</i> | CCACTATCACCTACGAGATTGC |
| <i>CgSOD1 R</i> | CACCGACGTGTCTGTTCTC    |
| <i>CgSOD2 F</i> | CACTACTCCAAGCACCACC    |
| <i>CgSOD2 R</i> | TTCGTGTACCCACCTCCA     |
| <i>CgSKN7 F</i> | ATGAGCCCTTCATTGCCT     |
| <i>CgSKN7 R</i> | TGGCGATTACAGTTTGTCTCCT |
| <i>CgAFT1 F</i> | TACCCGCAGGGAATAGAGATCG |
| <i>CgAFT1 R</i> | TTCATGTTCCCTAGCCAAAGCC |
| <i>CgAFT2 F</i> | GCCATGAACCAAAGGACCTACG |
| <i>CgAFT2 R</i> | GTAGAGAAAGTACACCGCACCC |
| <i>CgYAP5 F</i> | GTTGATCTGGATGGTCTGAAGG |
| <i>CgYAP5 R</i> | TCGGAGTAATTGAAGGTGAGC  |
| <i>CgCCC1 F</i> | GTTTCAGCAATGTGGACCCGC  |
| <i>CgCCC1 R</i> | GATCACCAGCTTCGCGTCAC   |
| <i>CgFTR1 F</i> | AGCCGGTTTGTCTCAAGAGG   |
| <i>CgFTR1 R</i> | CACCACCTTCAGAAGCATCACC |
| <i>CgISU1 F</i> | CGTCCGTTTACCAGGATGTACC |
| <i>CgISU1 R</i> | GTTCCGCAGAGTCTTGTCCA   |

**Table S2. Intracellular iron content in *C. glabrata* strains**

The amount of Fe in the samples was measured using an atomic absorption spectrometer in flame emission mode (Perkin Elmer 1100). Cells were incubated in the absence or presence of 1mM FeCl<sub>3</sub>. \* P <0,001

| FeCl <sub>3</sub> | µg Fe / 10 <sup>10</sup> cells |                |
|-------------------|--------------------------------|----------------|
|                   | wt                             | <i>Cgerg6Δ</i> |
| -                 | 7.3 ± 0.0                      | 6.1 ± 0.1      |
| +                 | 576.5 ± 2.5*                   | 1305 ± 25*     |
